# Supplementary material for: Nuclear α-catenin mediates the DNA damage response via β-catenin and nuclear actin
Source: Oxford University Press journal article supplement (doi:10.1242/jcs.199893), 2017-03-28
Supplement: jcs199893supp.pdf [file jcs199893supp.pdf]

**SUPPLEMENTARY FIGURES**

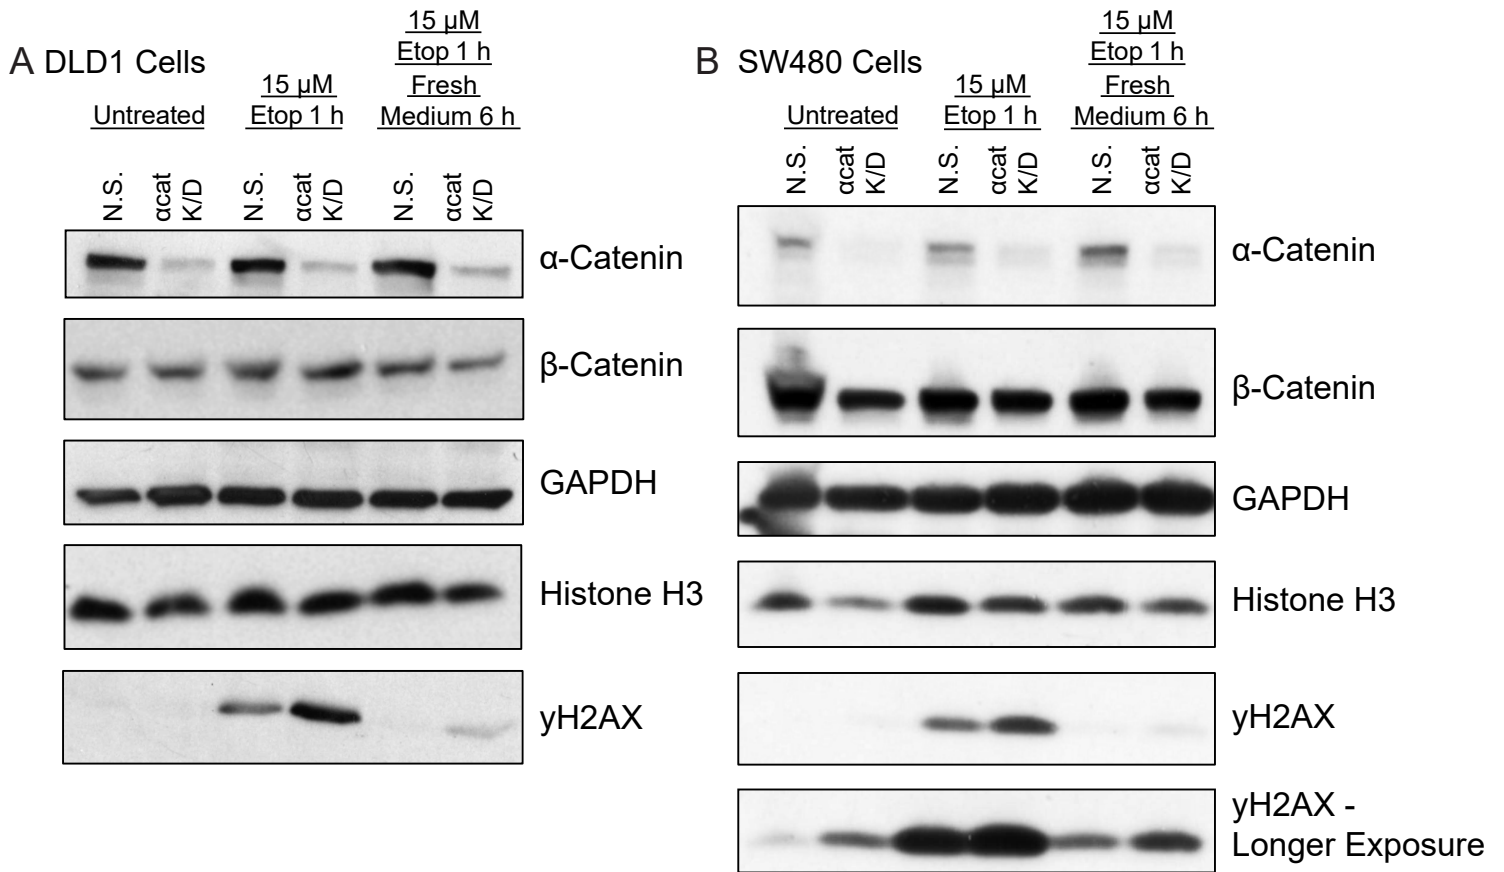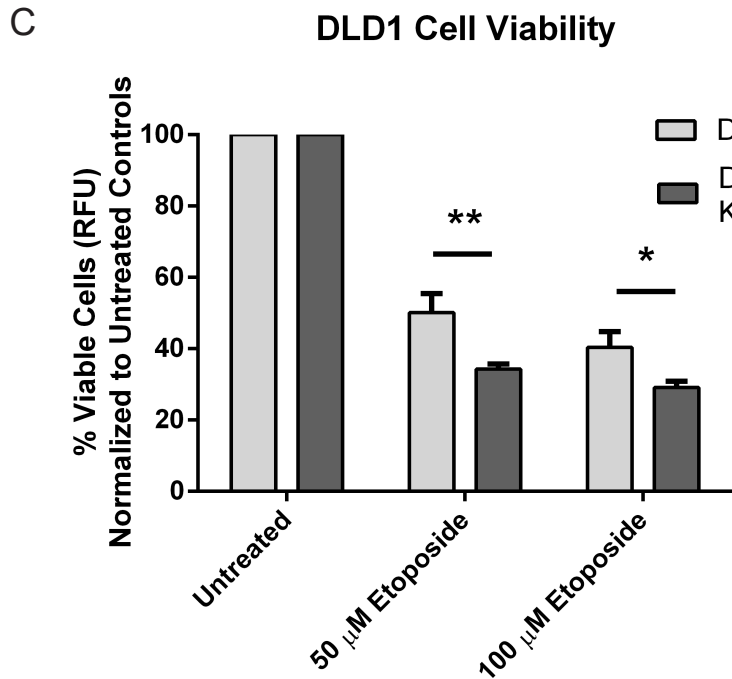

**Figure S1: Loss of  $\alpha$ -catenin increases  $\gamma$ H2AX levels and toxicity in colon cancer cells.**

(A) DLD1 cells stably transfected with non-specific (N.S.) and  $\alpha$ -catenin ( $\alpha$  cat K/D) shRNAs were left untreated, treated with 15  $\mu$ M etoposide for 1 hour, or treated with etoposide for 1 hour and left to recover for 6 hours in fresh medium. Cells were then extracted in hot SDS and Western blots were performed for the indicated proteins. Increased  $\gamma$ H2AX levels in etoposide treated  $\alpha$ -catenin knockdown cells were observed relative to wild type. (B) SW480 cells stably transfected with non-specific (N.S.) and  $\alpha$ -catenin ( $\alpha$  cat K/D) shRNAs were treated and prepared as in (A). (C) DLD1 cells stably transfected with non-specific (N.S.) and  $\alpha$ -catenin shRNAs were treated for 48 hours with the indicated concentrations of etoposide. The percentage of cells that remained viable was calculated relative to untreated controls. Mean + SEM is shown (N = 4; \* P < 0.05, \*\* P < 0.01 by 2-way ANOVA).

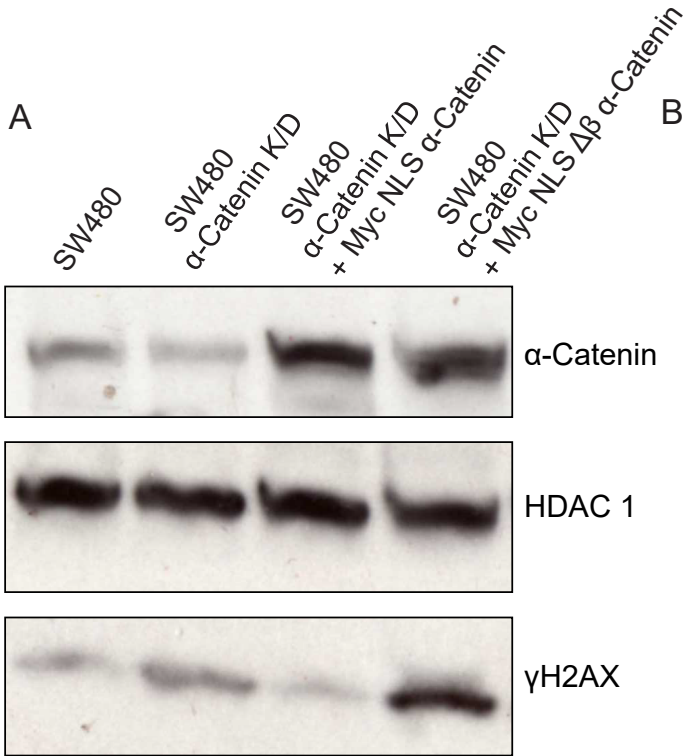

**B**

| Identified Proteins                           | Molecular Weight | Scaffold Identification Probability | Unique # peptides |
|-----------------------------------------------|------------------|-------------------------------------|-------------------|
| Catenin alpha-1                               | 100 kDa          | 100%                                | 69                |
| Glutathione S-transferase P                   | 23 kDa           | 100%                                | 12                |
| Catenin beta-1                                | 85 kDa           | 100%                                | 18                |
| ATP-dependent DNA helicase 2 subunit 2 (Ku80) | 83 kDa           | 100%                                | 5                 |
| Nucleophosmin                                 | 33 kDa           | 100%                                | 4                 |
| ATP-dependent DNA helicase 2 subunit 1 (Ku70) | 70 kDa           | 100%                                | 5                 |
| Poly [ADP-ribose] polymerase 1 (PARP1)        | 113 kDa          | 100%                                | 4                 |
| Nuclease-sensitive element-binding protein 1  | 36 kDa           | 100%                                | 2                 |
| Catenin alpha-2                               | 105 kDa          | 100%                                | 2                 |

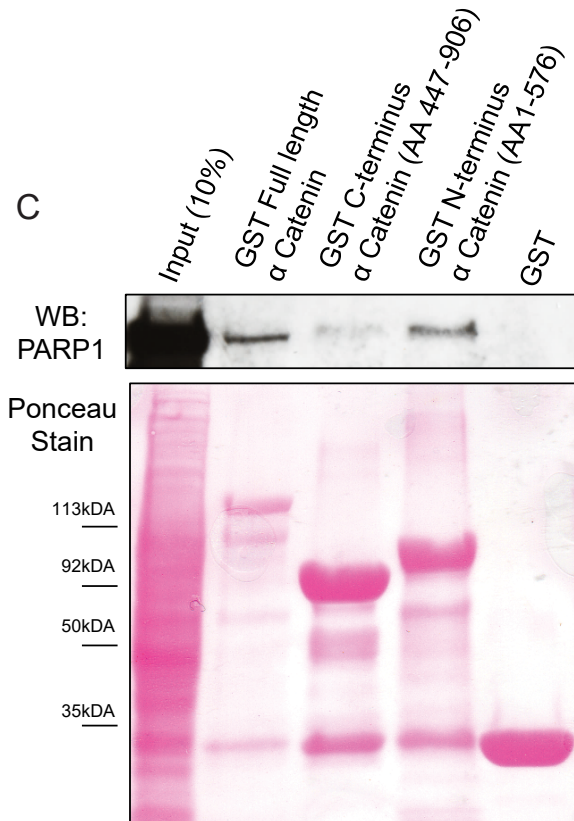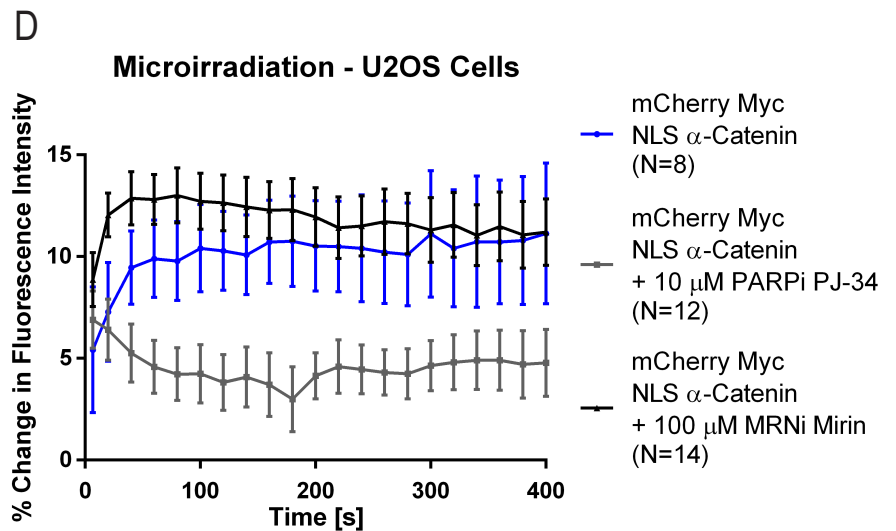

**Figure S2: Nuclear  $\alpha$ -catenin interacts with several DNA damage proteins.**

(A) Nuclear extracts isolated from SW480 wildtype cells,  $\alpha$ -catenin knockdown cells infected with non-specific hairpin shRNA lentivirus, and  $\alpha$ -catenin knockdown cells rescued with lentivirus expressing Myc NLS  $\alpha$ -catenin or Myc NLS  $\Delta\beta$   $\alpha$ -catenin were blotted for  $\gamma$ H2AX. Re-expression of Myc NLS full length  $\alpha$ -catenin but not Myc NLS  $\Delta\beta$   $\alpha$ -catenin resulted in  $\gamma$ H2AX levels similar to wild type cells. HDAC1 was used as a loading control. (B) Nuclear extract from SW480  $\alpha$  catenin knockdown cells was incubated with GST  $\alpha$ -catenin protein *in vitro* and GST pulldowns were performed. Mass spectrometry analysis identified several DNA damage pathway related proteins. Proteins with a 100% probability of identification and  $\geq 2$  identified peptides are reported. (C) Nuclear extract from SW480  $\alpha$ -catenin knockdown cells was incubated with GST full length  $\alpha$ -catenin protein, GST N-terminus  $\alpha$ -catenin, GST C-terminus  $\alpha$ -catenin, or GST alone *in vitro* and GST pulldowns were performed. Western blotting for PARP1 shows a specific interaction with  $\alpha$ -catenin mediated through its N-terminus. Ponceau stain is shown to indicate GST protein levels. (D) U2OS cells were transfected with mCherry fused to Myc NLS  $\alpha$ -catenin for 48 hours. Cells were then treated with 30 mM LiCl, incubated with Hoechst 33342 (5  $\mu$ g/mL) to sensitize the cells, and microirradiated to induce localized sites of DNA damage. Recruitment of mCherry Myc NLS  $\alpha$ -catenin (N = 8) and mCherry Myc NLS  $\alpha$ -catenin pre-treated with the PARP inhibitor, PJ34 (PARPi; N = 12), or Mre11-Rad50-Nbs1 (MRN) complex inhibitor, Mirin, for 1 hour (MRNi; N = 14) are shown (Mean  $\pm$  SEM). PARP inhibition was able to reduce  $\alpha$ -catenin recruitment. However, MRN, which is also responsible for the early recognition of DNA lesions and downstream signaling, was not identified in our proteomics screen and has no effect on  $\alpha$ -catenin recruitment.

A

### Microirradiation - SW480 $\alpha$ -Catenin Knockdown Cells - EGFP or $\beta$ -Actin EYFP

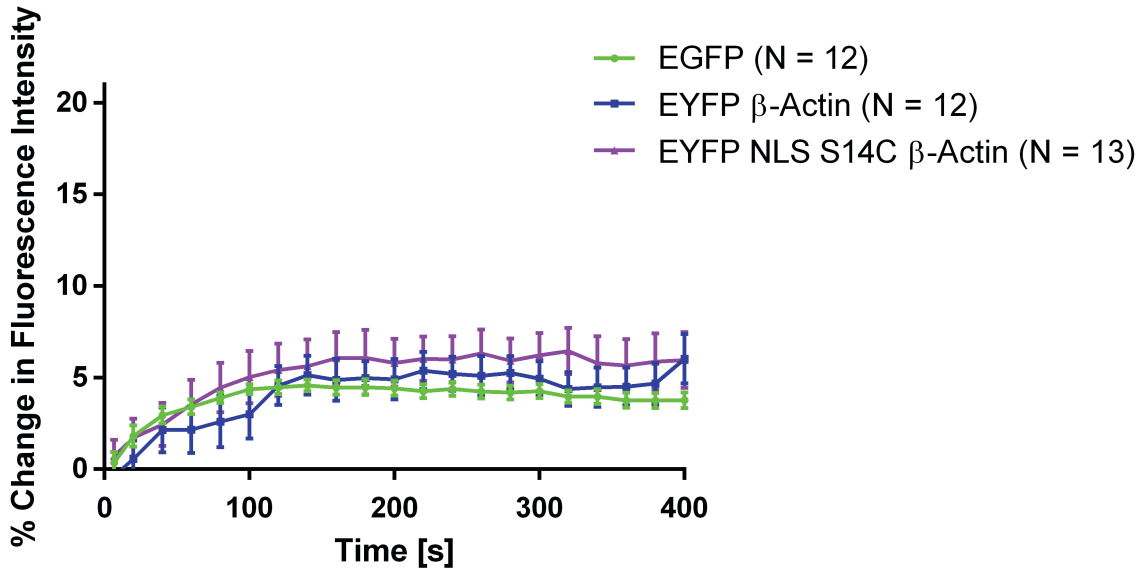

B

### Microirradiation - U2OS Cells

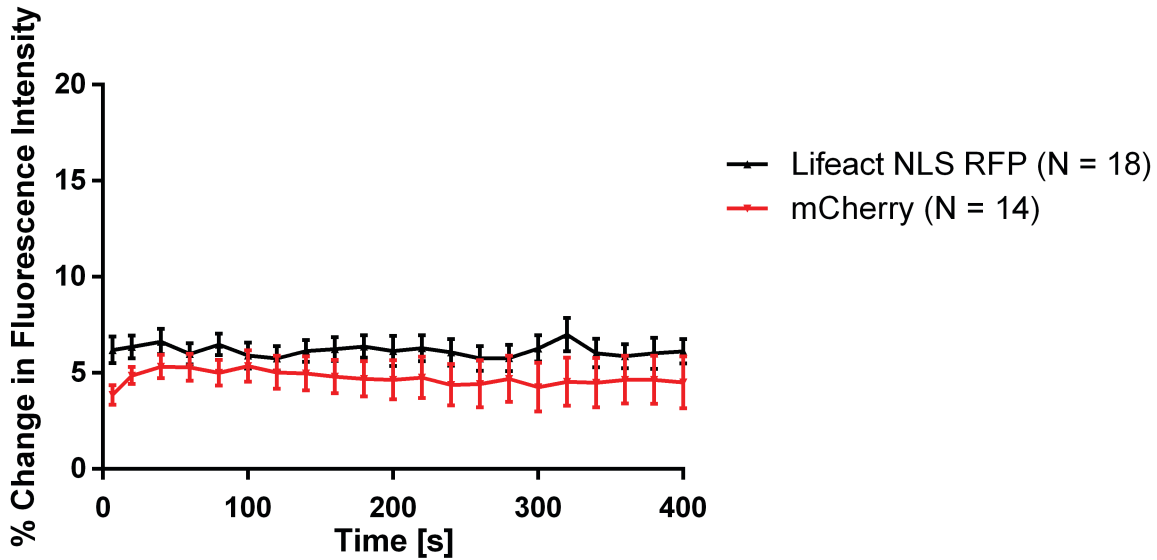

**Figure S3: Nuclear actin is not enriched at sites of DNA repair.**

(A) SW480  $\alpha$ -catenin knockdown cells transfected with EGFP alone, EYFP  $\beta$ -actin, or EYFP NLS S14C  $\beta$ -actin for 48 hours were pre-treated with Hoechst 33342 (5  $\mu$ g/mL) and microirradiation experiments were performed. Mean  $\pm$  SEM are shown. (B) U2OS cells transfected with mCherry alone or Lifeact NLS RFP for 24 hours were pre-treated with 30 mM LiCl, Hoechst 33342 (5  $\mu$ g/mL), and microirradiation experiments were performed. Mean  $\pm$  SEM are shown.
